# Supplementary material for: Multifunctional, marvelous polyimide aerogels as highly efficient and recyclable sorbents
Source: Royal Society of Chemistry journal article supplement (doi:10.1039/c4ra15115a), 2015-01-01
Supplement: c4ra15115a1.pdf [file c4ra15115a1.pdf]

# Supporting information

## Multifunctional, Marvelous Polyimide Aerogels as High-efficient and Recyclable Sorbent

Li Zhang, Juntao Wu\*, Xiaomin Zhang, Guangming Gong, Jingang Liu and Lin Guo

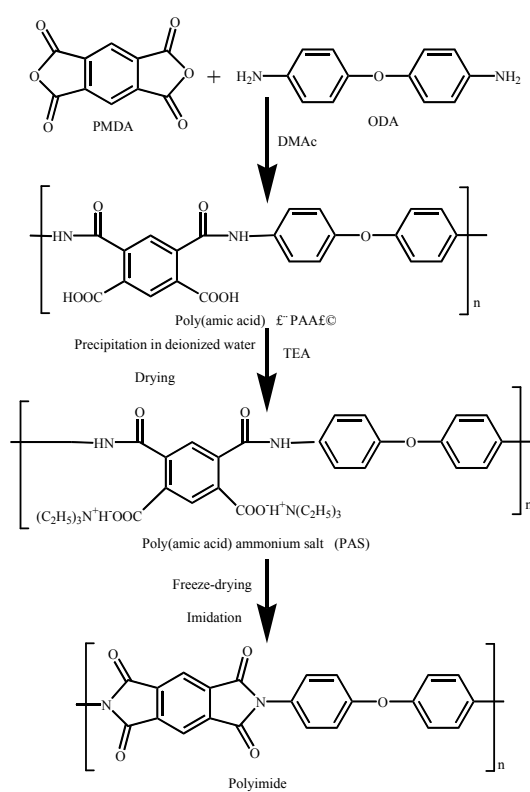

Figure S1. Reaction Scheme of PI aerogel.

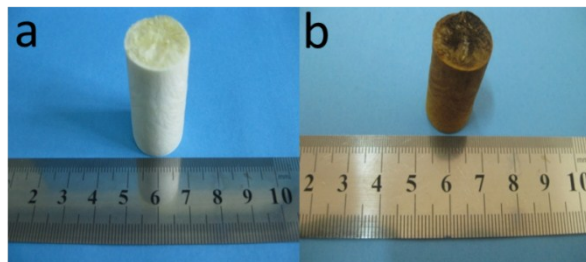

**Figure S2. Digital photographs of a PI aerogel before (a) and after (b) imidation.**

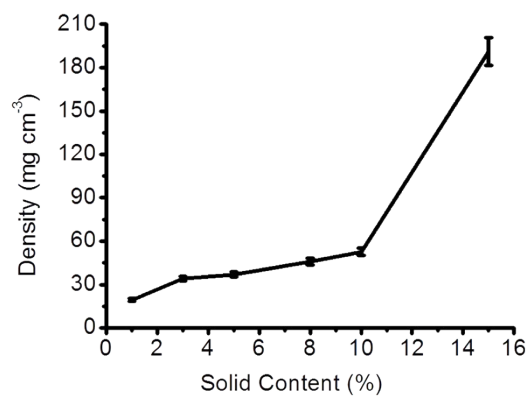

**Figure S3. Densities of the PI aerogels as a function of solid content.**

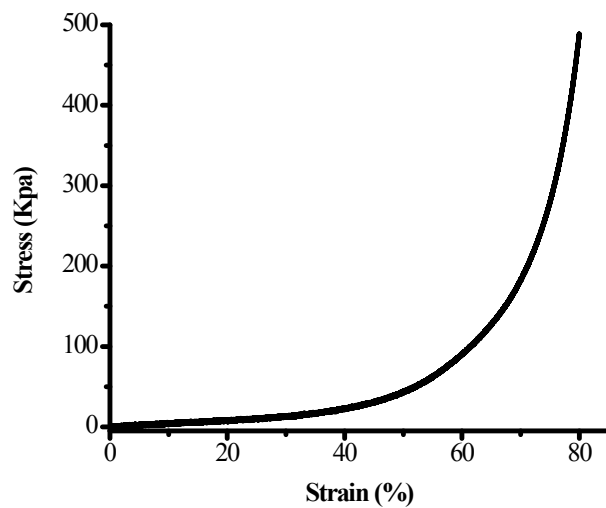

**Figure S4. Compressive stress–strain curves of PI aerogel at a solid content of 8%.**

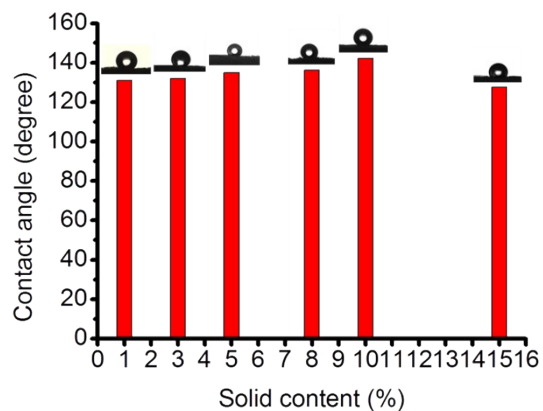

**Figure S5. Water contact angles of the PI aerogels as a function of solid content.**

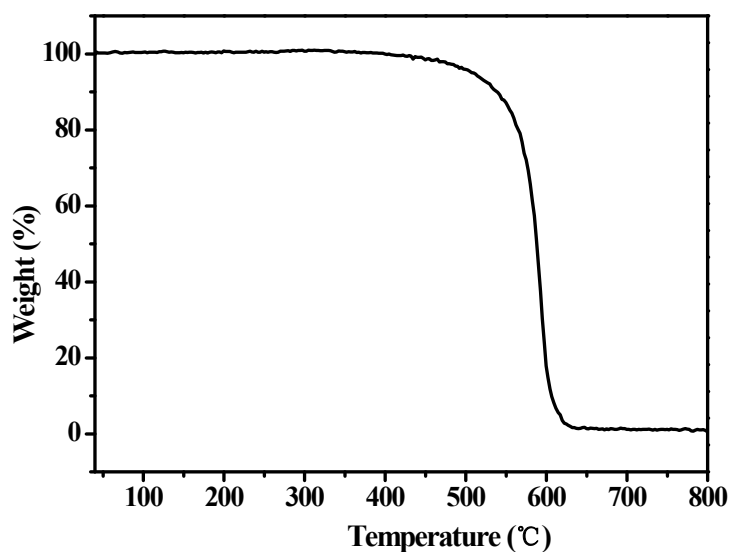

**Figure S6. TGA curve of PI aerogel.**

*Supporting Information Movie 1: Compression of PI aerogel.*

*Supporting Information Movie 2: Selective absorption of PI aerogel for oil.*

*Supporting Information Movie 3: Repeated absorption of PI aerogel for oil by squeezing.*

*Supporting Information Movie 4: Absorption of PI aerogel for liquid nitrogen.*
